# Supplementary material for: Risk of SARS-CoV-2 exposure among hospital healthcare workers in relation to patient contact and type of care
Source: bioRxiv or medRxiv preprint supplement (doi:10.1101/2021.01.28.21250664), 2021-01-29
Supplement: Supplementary file [file media-1.pdf]

Number of patients

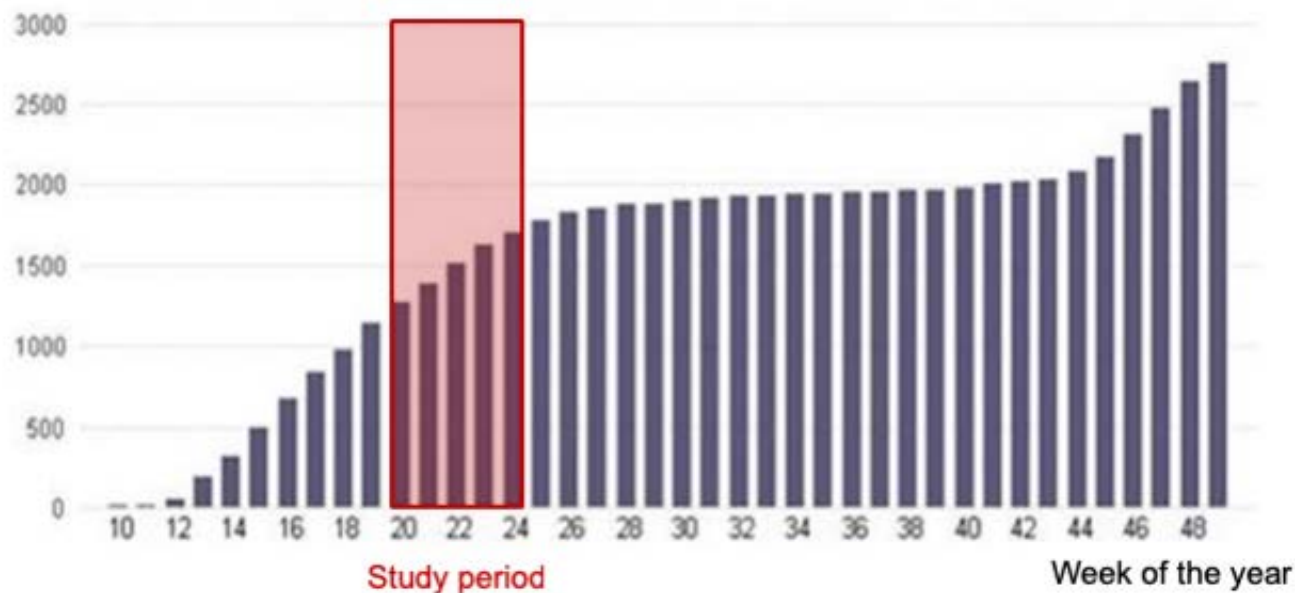

Cumulative number of patients with confirmed SARS-CoV-2 infection admitted to Stockholm South General Hospital (Södersjukhuset) 2020
